# Supplementary material for: Polyhydroxyalkanoate Copolymer Production by Recombinant Ralstonia eutropha Strain 1F2 from Fructose or Carbon Dioxide as Sole Carbon Source
Source: MDPI journal article supplement (doi:10.3390/bioengineering11050455), 2024-05-02
Supplement: s1 [file s1]

## Supplementary information

# Polyhydroxyalkanoate Copolymer Production by Recombinant *Ralstonia eutropha* Strain 1F2 from Fructose or Carbon Dioxide as Sole Carbon Source

Chih-Ting Wang, Ramamoorthi M Sivashankari, Yuki Miyahara \*, and Takeharu Tsuge \*

Department of Materials Science and Engineering, Tokyo Institute of Technology,  
4259 Nagatsuta, Midori-ku, Yokohama 226-8502, Japan;

wang.c.aq@m.titech.ac.jp (C.-T.W.); sivashankari.m.aa@m.titech.ac.jp (R.M.S.)

\* Correspondence: miyahara.y.aa@m.titech.ac.jp (Y.M.);

tsuge.t.aa@m.titech.ac.jp (T.T.); Tel.: +81-45-924-5420 (T.T.)

**Table S1** Nucleotide sequence of the genes chemically synthesized in this study.

| <i>kivd</i> gene                                                                                                                                                                                                                                                                                                                                                                                                                                                                                                                                                                                                                                                                                                                                                                                                                                                                                                                                                                                                               |
|--------------------------------------------------------------------------------------------------------------------------------------------------------------------------------------------------------------------------------------------------------------------------------------------------------------------------------------------------------------------------------------------------------------------------------------------------------------------------------------------------------------------------------------------------------------------------------------------------------------------------------------------------------------------------------------------------------------------------------------------------------------------------------------------------------------------------------------------------------------------------------------------------------------------------------------------------------------------------------------------------------------------------------|
| ATGTATACGGTTGGCGATTACCTGTTAGATCGTCTGCATGAGTTAGGCATCG<br>AGGAAATTTTTGGAGTACCAGGTGACTACAATCTGCAGTTTCTGGATCAGA<br>TTATTTTCGCGCAAAGACATGAAATGGGTGGGAAATGCGAACGAATTGAATG<br>CCTCATATATGGCCGACGGCTATGCACGGACCAAAAAAGCAGCCGCCTTTC<br>TGACGACATTTGGCGTTCGGGGAATTGAGCGCCGTTAATGGCTTGGCGGGTA<br>GCTACGCGGAAAATCTTCCGGTTGTGGAGATTGTTGGTAGTCCTACCTCTA<br>AAGTCCAGAACGAGGGCAAATTCGTGCACCATACCCTTGCGGATGGCGATT<br>TCAAACACTTTTATGAAAATGCATGAACCGGTTACCGCTGCGAGAACCCTGC<br>TGACGGCAGAAAACGCCACCGTCGAGATTGACCGTGTTTTTGAGCGCTCTC<br>CTGAAAGAGCGCAAACCGGTGTACATCAACTTGCCAGTGGATGTCGCAGC<br>CGCAAAAGCGGAAAAACCCAGTTTACCTCTGAAGAAAGAAAATCCGACGT<br>CGAATACGAGCGATCAGGAGATCCTGAACAAAATTCAGGAAAGTCTGAAG<br>AATGCGAAAAAACCGATTGTCATAACAGGCCACGAAATTATTTTCCTTTGGC<br>CTGGAAAACACCGTGACTCAGTTCATCTCGAAAACCAAATTGCCATTACT<br>ACCCTTAACTTCGGGAAGTCTTCCGTGGACGAGACACTGCCGTCATTTTAA<br>GGGATCTACAATGGCAAACCTGAGTGAACCGAATCTCAAAGAGTTCGTAGA<br>ATCTGCCGATTTTCATCCTCATGCTGGGCGTAAACTTACCGATAGCTCAACC<br>GGTGCGTTTACTCACCATCTTAACGAGAACAAGATGATTTTCGCTGAATATCG |

ATGAAGGTAAGATATTCAACGAAAGCATCCAGAATTTGACTTCGAAAGCC  
TGATTTCCAGTCTGCTCGATTTGAGCGGTATTGAATACAAAGGCAAATATAT  
TGACAAGAAACAGGAGGATTTTGTACCGAGCAACGCGTTACTGAGTCAAG  
ATCGACTGTGGCAAGCTGTAGAAAATCTGACGCAAAGCAACGAAACGATA  
GTTGCAGAACAGGGTACTTCGTTCTTTGGTGCCAGTTCTATTTTTCTCAAAC  
CGAAATCCCACCTTCATCGGTCAACCGCTGTGGGGTTCTATCGGGTATACCTT  
TCCTGCGGCGCTAGGATCGCAAATTGCCGACAAAGAATCACGCCATCTGCT  
GTTTATTGGCGATGGCTCTCTGCAACTGACTGTGCAGGAACTGGGCCTAGC  
TATTCGCGAAAAGATCAATCCCATCTGCTTTATCATCAACAACGACGGTTAT  
ACAGTTGAACGCGAGATCCATGGTCCAAACCAGTCCTATAACGACATTCCT  
ATGTGGAAC TATAGCAAATTACCGGAATCGTTCGGAGCTACCGAGGAACGT  
GTGGTGAGCAAGATTGTGCGTACGGAAAACGAGTTTGTCTCAGTCATGAA  
AGAAGCACAAGCAGATCCGAATCGTATGTATTGGATCGAACTGGTTCTTGC  
GAAAGAAGATGCGCCAAAAGTGCTCAAGAAAATGGGGAAAGTTATTTGCTG  
AACAGAACAAATCCTGA

*padA* gene

ATGACCGAACCACATGTCGCGGTCTTGAGCCAGGTGCAACAGTTCCTCGAT  
CGTCAACATGGGTTGTACATCGATGGTCGCCCAGGTCCTGCCCAGAGTGAG  
AAACGTCTTGCTATCTTTGATCCAGCTACGGGTCAGGAAATTGCGTCGACC  
GCGGATGCCAACGAAGCGGACGTGGACAACGCAGTTATGTCCGCTTGGCG  
CGCTTTTGTGTCGCGCCGTTGGGCAGGCCGGCTTCCAGCGGAACGTGAAC  
GCATTCTGTTGCGCTTTGCCGATTTGGTCGAACAGCACAGCGAAGAGCTG  
GCACAGCTGGAGACACTCGAACAGGGCAAAAGCATCGCCATTTGCGGTGC  
CTTTGAAGTTGGTTGCACGCTGAACTGGATGCGGTATACAGCCGGGCTCAC  
CACCAAAATCGCGGGCAAAACGTTGGACCTGTCTATTCCCTTACCGCAAGG  
TGCCCGCTATCAAGCCTGGACTCGCAAAGAACCGGTGGGTGTGGTTGCGG  
GCATTGTCCCGTGGAATTTCCCTGATGATTGGTATGTGGAAAGTAATGCC  
CGCTCTTGACGCCGGTTGCAGCATTGTCATTAAGCCGTCAGAACTACCCC  
GCTTACCATGCTCCGTGTTGCCGAATTAGCATCTGAGGCAGGCATTCCGGA  
CGGTGTGTTCAACGTCGTGACCGGCTCAGGTGCGGTTTGTGGTGCCGCGC  
TGACTTCGCATCCACATGTAGCGAAGATCAGTTTCACCGGCTCCACAGCGA  
CTGGCAAAGGCATTGCGCGTACTGCGGCGGATCACTTAACGCGCGTGACG  
CTGGAAC TGGGCGGAAAGAATCCGGCGATCGTCCTGAAAGATGCCGATCC  
TCAGTGGGTGATTGAGGGCCTGATGACCGGGAGCTTCCTGAATCAAGGCC  
AGGTCTGTGCAGCGTCTAGCCGTATCTACATTGAGGCACCGCTGTTTGACA

CCCTGGTATCAGGTTTCGAGCAAGCGGTAAAATCCTTACAAGTGGGTCCGG  
GCATGTCCCCGGTAGCGCAGATTAATCCGCTGGTGAGTCGTGCACATTGCG  
ACAAAGTGTGTTTCGTTTCCTGGATGACGCACAGGCTCAGCAAGCGGAACTG  
ATCCGTGGAAGCAATGGCCCTGCTGGGGAAGGATATTACGTTGCCCCGACA  
CTGGTGGTGAACCCGGATGCTAAACTGCGCTTAACCCGCGAAGAAGTCTT  
TGGGCCTGTTGTTAACCTGGTTCGCGTTGCCGATGGTGAAGAGGCGCTTCA  
GTTAGCCAATGACACGGAGTATGGTCTGACCGCCAGTGTATGGACGCAGA  
ACCTGAGTCAGGCACTCGAATACAGCGATCGCCTGCAAGCAGGCACCGTT  
TGGGTGAACTCCCACACGTTGATCGATGCTAATCTGCCCTTTGGCGGCATG  
AAGCAGTCTGGCACGGGGCGCGACTTTGGACCGGATTGGCTGGATGGATG  
GTGTGAAACCAAATCAGTGTGCGTACGCTATTGA

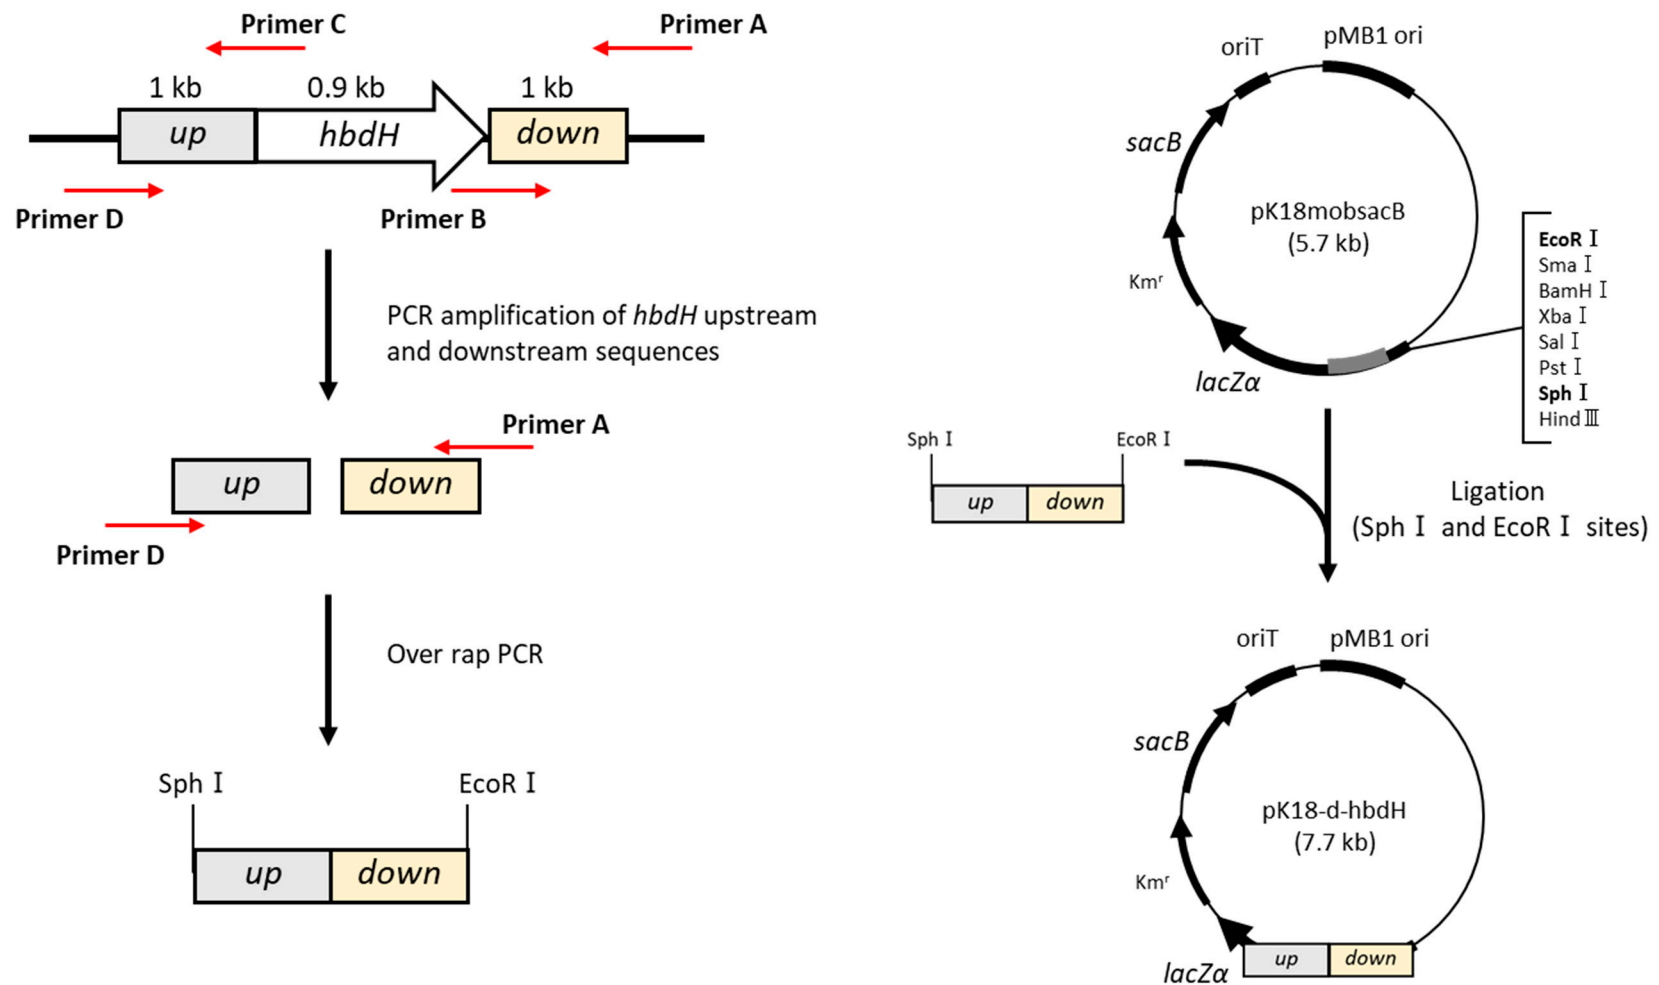

**Figure S1** Construction of the suicide plasmid of pK18-d-hbdH

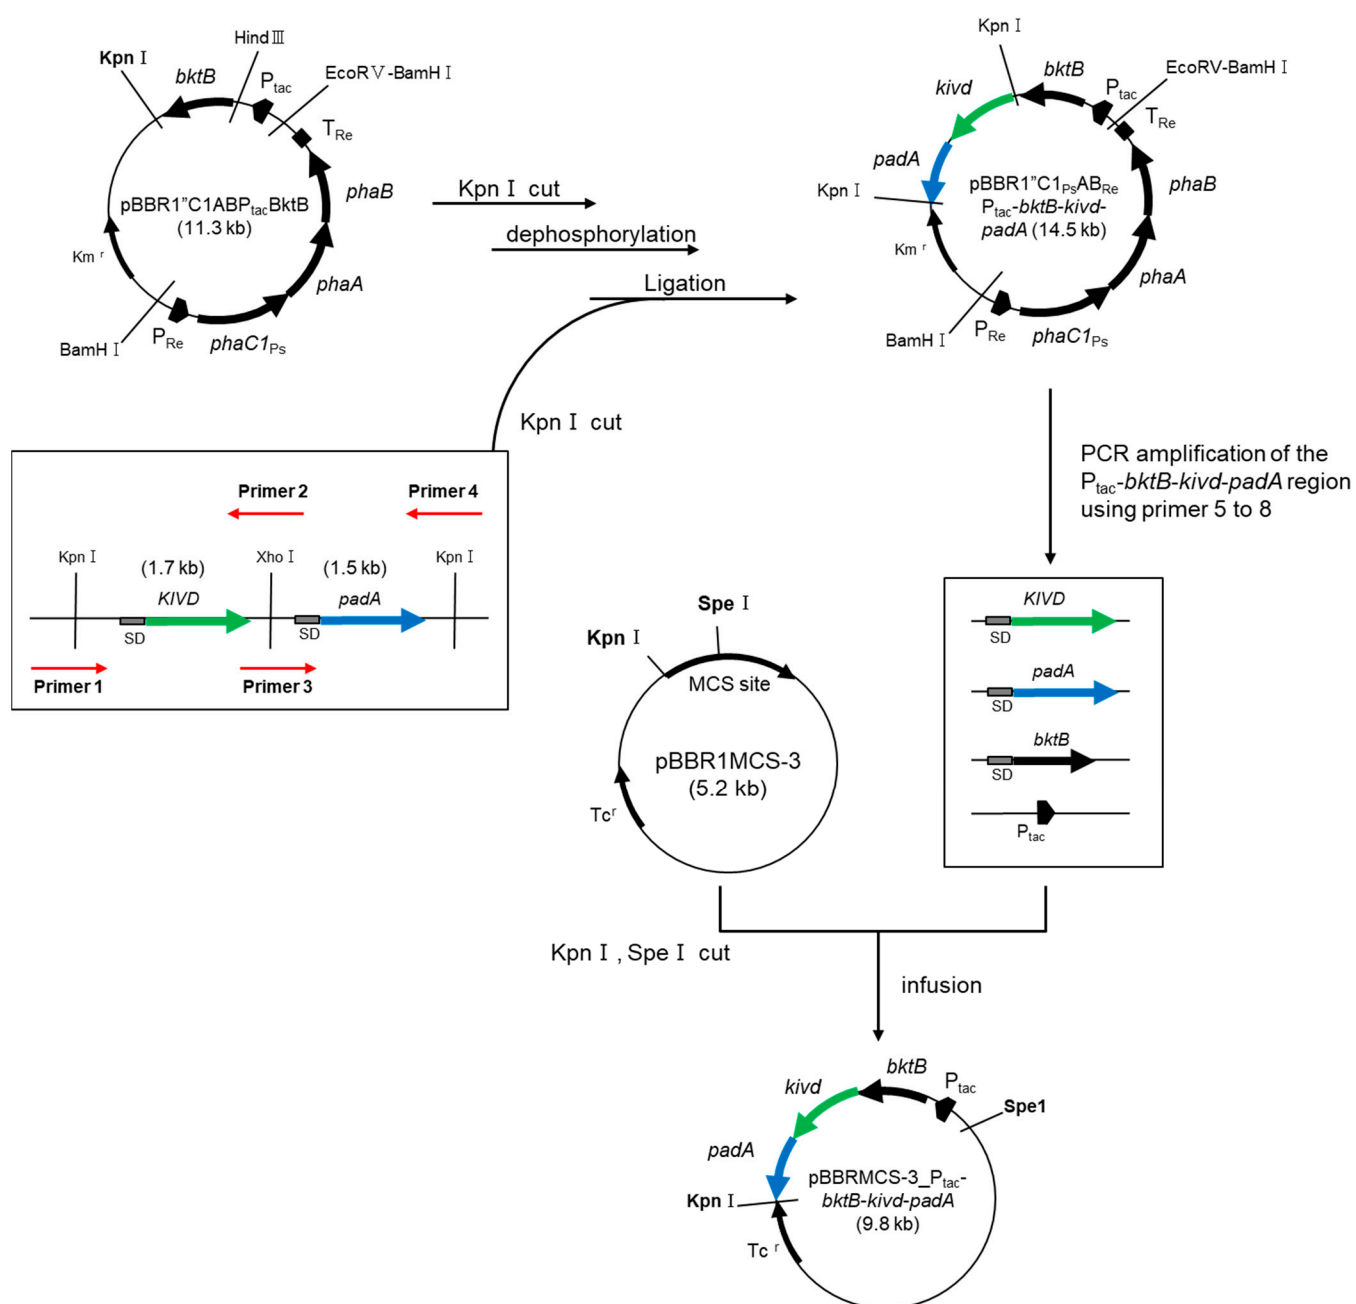

**Figure S2** Construction of pBBR1''C1<sub>Ps</sub>AB<sub>Re</sub>P<sub>tac</sub>-*bktB*-*kivd*-*padA* and pBBRMCS-3\_P<sub>tac</sub>-*bktB*-*kivd*-*padA*

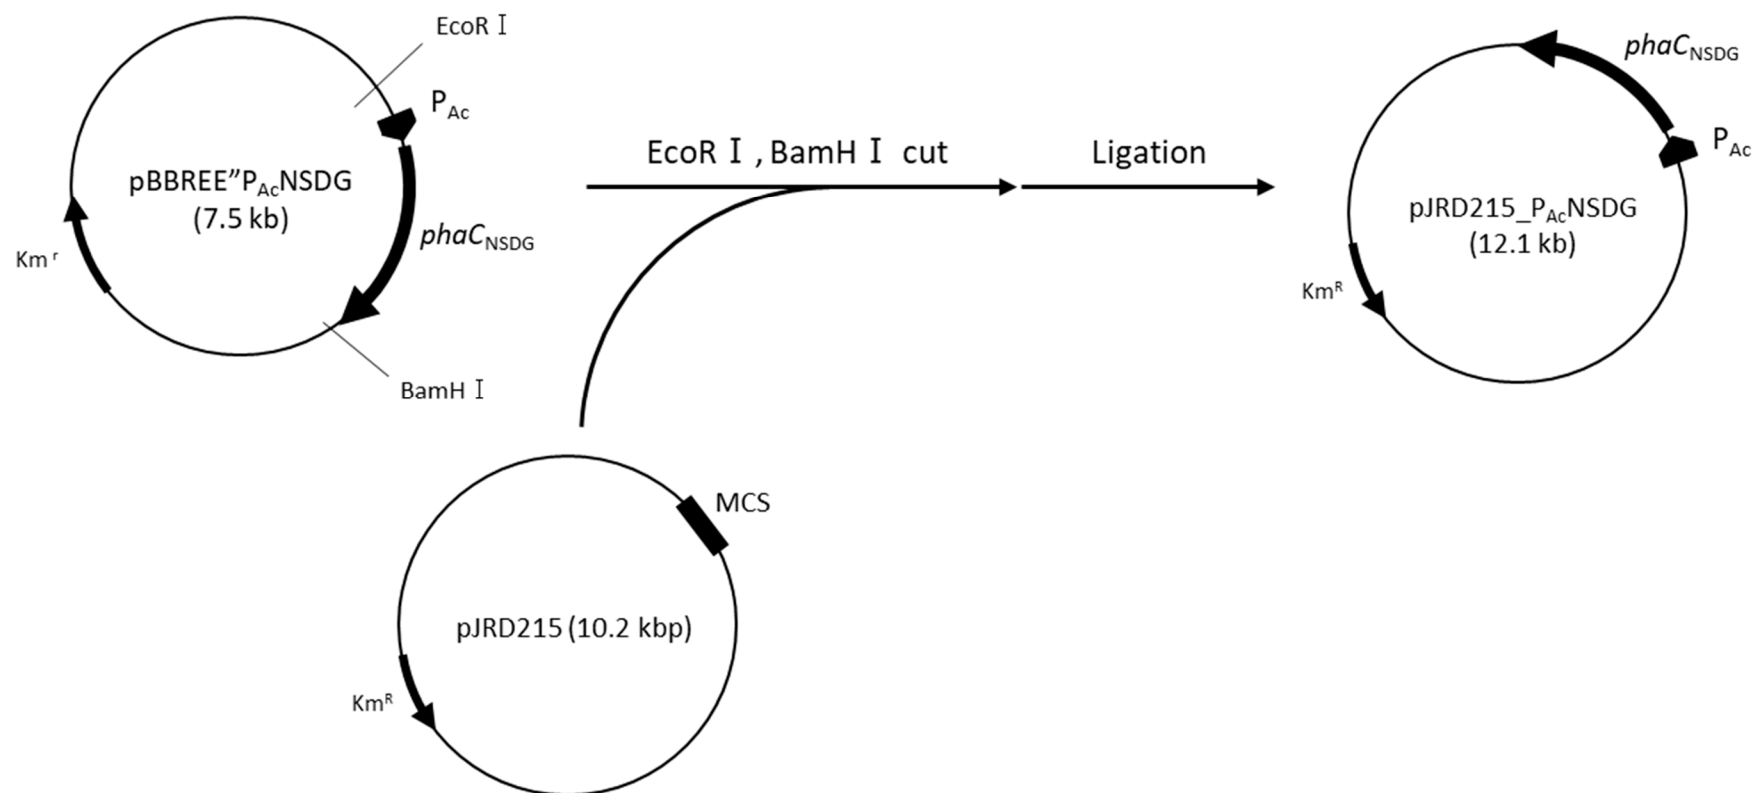

**Figure S3** Construction of pJRD215\_P<sub>Ac</sub>\_phaC<sub>Ac</sub>\_NSDG
